# Supplementary material
Source: publisher figshare collection journal article supplement (https://plos.figshare.com/articles/dataset/_/128044)
Supplement: Supplementary file 1 [file 1 › Appendix_S2.pdf]

## Appendix S2. Condition for gel formation for LAT population with mixed valence

The  $n$ -th equation in this appendix is numbered as (S2- $n$ ). For example, the first equation is numbered as (S2-1). An equation numbered as (S1- $n$ ) refers to the  $n$ -th equation of Appendix S1. All the other equations mentioned in the following derivations refer to equations in the main body of the article.

Using Eqs. (19) to (22), Eq. (18) can be re-written as

$$q = \frac{M_T}{L_T} m(1 + \beta + \Omega/2) + \frac{D_T}{L_T} d(1 + \beta + \Omega)^2 + w \left[ 1 + 3\eta z - 2z^3 + 2(z^2 - \eta)^{\frac{3}{2}} \right], \quad (\text{S2-1})$$

where  $w$  is given by Eq. (S1-5),  $\eta$  by Eq. (S1-8) and

$$z = \frac{1 - 2\delta'w}{2\delta'w}. \quad (\text{S2-2})$$

Using the definitions of  $M_1$  and  $q$  in Eqs. (36) and (S2-1) respectively, we can show that

$$\begin{aligned} M_1 &= l \left( \frac{\partial q}{\partial l} \right) + d \left( \frac{\partial q}{\partial d} \right) + m \left( \frac{\partial q}{\partial m} \right) \\ &= \left( \frac{M_T}{L_T} \right) m(1 + \beta + \Omega) + \left( \frac{D_T}{L_T} \right) d(1 + \beta + \Omega)^2 \left( 1 + \frac{2\Omega}{1 + \beta + \Omega} \right) \\ &+ w \left( 1 + \frac{3\Omega}{1 + \beta + \Omega} \right) \left[ 1 + 3\eta z - 2z^3 + 2(z^2 - \eta)^{\frac{3}{2}} \right] \\ &- \frac{w(\eta - 1)\Omega}{1 + \beta + \Omega} \left[ 3z - 3(z^2 - \eta)^{\frac{1}{2}} \right] \\ &- w(z + 1) \left( \frac{1}{1 - c\delta\epsilon} + \frac{\Omega}{1 + \beta + \Omega} \right) \left[ 3\eta - 6z^2 + 6z(z^2 - \eta)^{\frac{1}{2}} \right]. \end{aligned} \quad (\text{S2-3})$$

According to Eq. (37),  $M_2$  can be expressed as

$$M_2 = l \left( \frac{\partial M_1}{\partial l} \right) + d \left( \frac{\partial M_1}{\partial d} \right) + m \left( \frac{\partial M_1}{\partial m} \right). \quad (\text{S2-4})$$

From Eqs. (S2-3) and (S2-4), it can be shown that

$$M_2 = M_{21} + M_{22} + M_{23} + M_{24} + M_{25} + M_{26} + M_{27} + M_{28}, \quad (\text{S2-5})$$

where

$$M_{21} = \left( \frac{M_T}{L_T} \right) m(1 + \beta + \Omega) \left( 1 + \frac{\Omega}{1 + \beta + \Omega} \right), \quad (\text{S2-6})$$

$$M_{22} = \left( \frac{D_T}{L_T} \right) d(1 + \beta + \Omega)^2 \left[ 1 + \frac{6\Omega}{1 + \beta + \Omega} + 2 \left( \frac{\Omega}{1 + \beta + \Omega} \right)^2 \right], \quad (\text{S2-7})$$

$$M_{23} = w \left[ 1 + 3\eta z - 2z^3 + 2(z^2 - \eta)^{\frac{3}{2}} \right] \left[ 1 + \frac{9\Omega}{1 + \beta + \Omega} + 6 \left( \frac{\Omega}{1 + \beta + \Omega} \right)^2 \right], \quad (\text{S2-8})$$

$$M_{24} = -\frac{w(\eta - 1)\Omega}{1 + \beta + \Omega} \left[ 3z - 3(z^2 - \eta)^{\frac{1}{2}} \right] \left( 3 + \frac{4\Omega}{1 + \beta + \Omega} \right), \quad (\text{S2-9})$$

$$\begin{aligned} M_{25} &= - \left[ 3\eta - 6z^2 + 6z(z^2 - \eta)^{\frac{1}{2}} \right] \left[ \frac{(1 + \beta + \Omega)^2}{2\alpha c} + \frac{2\Omega(1 + \beta + \Omega)}{\alpha c} \right. \\ &\quad \left. + w(z + 1) \left( \frac{3\Omega}{1 + \beta + \Omega} \right) + w(z + 1) \left( \frac{2\Omega}{1 + \beta + \Omega} \right)^2 \right], \end{aligned} \quad (\text{S2-10})$$

$$M_{26} = \frac{(1 + \beta + \Omega)(1 + \beta + 2\Omega - cd\epsilon\Omega)}{2\alpha c} \frac{3(\eta - 1)\Omega}{1 + \beta + \Omega}, \quad (\text{S2-11})$$

$$M_{27} = -\frac{(1+\beta+\Omega)(1+\beta+2\Omega-cd\epsilon\Omega)}{2\alpha c} \left[ \frac{(1+\beta+\Omega)^2}{\alpha c w} \left\{ 6z - 3(z^2 - \eta)^{\frac{1}{2}} \right\} \right. \\ \left. + \frac{\Omega}{1+\beta+\Omega} \left\{ 3(1 - \eta) + 12z(z + 1) - 6(z + 1)(z^2 - \eta)^{\frac{1}{2}} \right\} \right], \quad (\text{S2-12})$$

and

$$M_{28} = \frac{3(1 + \beta + \Omega)}{2\alpha c w (z^2 - \eta)^{\frac{1}{2}}} \left[ (1 + \beta + 2\Omega) - \left( \frac{1 - cd\epsilon}{2\alpha cl} \right) \left\{ 1 + \frac{\Omega}{1 + \beta + \Omega} (1 - cd\epsilon) \right\} \right]. \quad (\text{S2-13})$$

From Eqs. (S2-5)-(S2-13), we find by observation that for  $z^2 = \eta$ ,  $M_2 \rightarrow \infty$ . Thus, at the gel point,

$$(z + \eta^{\frac{1}{2}})(z - \eta^{\frac{1}{2}}) = 0. \quad (\text{S2-14})$$

The above equation in  $z$  has two roots, of which only the positive root  $z = \eta^{\frac{1}{2}}$  is physically acceptable, so that the following equation in  $z$  holds at the gel point.

$$z = \eta^{\frac{1}{2}} \quad (\text{S2-15})$$

Using Eqs. (20), (23), (S1-5) and (S2-2) for  $\eta$ ,  $\delta'$ ,  $w$  and  $z$  respectively, the above equation can be re-written as

$$\frac{1 - cd\epsilon}{2\alpha cl(1 + \beta + \Omega)} = 1 + \left[ 1 + \frac{\epsilon d}{\alpha l(1 + \beta + \Omega)} \right]^{\frac{1}{2}}. \quad (\text{S2-16})$$
